# Supplementary material for: Measuring and understanding information storage and transfer in a simulated human gut microbiome
Source: PubMed Central journal article supplement (PMC11407623; doi:10.1371/journal.pcbi.1012359), 2024-09-17
Supplement: pcbi.1012359.s009.pdf [file pcbi.1012359.s009.pdf]

## Parameter choices in QtAC

|                       | QtAC_AIS | QtAC/QtAC_CTE |
|-----------------------|----------|---------------|
| <b>mode</b>           | "local"  | "local"       |
| <b>num_timepoints</b> | 184      | 184           |
| <b>k</b>              | 10       | 10            |
| <b>l</b>              |          | 9             |
| <b>k_tau</b>          | 1        | 1             |
| <b>l_tau</b>          |          | 1             |
| <b>delay</b>          |          | 2             |
| <b>noise_level</b>    | 1.00E-08 | 1.00E-20      |
| <b>num_permcheck</b>  | 1.00E+03 | 1.00E+03      |
| <b>signfac</b>        | 0.05     | 0.05          |
